# Supplementary material for: Organelle Engineering in Yeast: Enhanced Production of Protopanaxadiol through Manipulation of Peroxisome Proliferation in Saccharomyces cerevisiae
Source: MDPI journal article supplement (doi:10.3390/microorganisms10030650), 2022-03-18
Supplement: s1 [file s1]

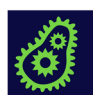

## Supplementary materials

Table S1. Primers used in this study.

| Gene                                           | Sequence (5' to 3')                                                                 | Enzyme site                 |
|------------------------------------------------|-------------------------------------------------------------------------------------|-----------------------------|
| <i>tHMG1</i>                                   | F: CGGCGGCCGCAAAATGTCTATTCCAGAACTC<br>R: GCACTAGTTTATTAGAAAGTGCAACAA                | <i>NotI</i><br><i>SpeI</i>  |
| <i>ERG9</i>                                    | F: GCGGGATCCAAAATGGGAAAGCTATTACAAT<br>R: CGCTCGAGGCTCACGCTCTGGTAAAGTG               | <i>BamHI</i><br><i>XhoI</i> |
| <i>ERG9-PTS1</i>                               | F: GCGGGATCCAAAATGGGAAAGCTATTACAAT<br>R: CGCCTCGAGGCTCACAACCTAGACGCTCTGTGTAAAGTG    | <i>BamHI</i><br><i>XhoI</i> |
| <i>ERG1</i>                                    | F: GCGGGATCCAAAATGTTTACTTTGAGGAGG<br>R: CGGCTAGCCGTTATGGGCGGGGATT                   | <i>BamHI</i><br><i>NheI</i> |
| <i>ERG1-PTS1</i>                               | F: GCGGGATCCAAAATGTTTACTTTGAGGAGG<br>R: CGGCTAGCCGTTACAACCTAGATGGGCGGGGATT          | <i>BamHI</i><br><i>NheI</i> |
| <i>DS</i>                                      | F: CGCGCGGCCGCAAAATGGCAAAGCAAAAGGG<br>R: GCACTAGTGCTTAAATTTTCAGTTGTTGGTGC           | <i>NotI</i><br><i>SpeI</i>  |
| <i>DS-PTS1</i>                                 | F: CGCGCGGCCGCAAAATGGCAAAGCAAAAGGG<br>R: GCACTAGTGCTTACAACCTAGAAATTTTCAGTTGTTGGTGC  | <i>NotI</i><br><i>SpeI</i>  |
| <i>DS-PTS2</i>                                 | F: GCGCGGCCGCAAAATGGCAAAGCAAAAGGG<br>R: CGACTAGTGCTTAAATTTTCAGTTGTTGGTGC            | <i>NotI</i><br><i>SpeI</i>  |
| <i>PPDS</i>                                    | F: GCGGGATCCAAAATGGTGTATTCTCTCCC<br>R: CGCCCGGGGCTTAGTTGTGAGGATGCAAAT               | <i>BamHI</i><br><i>SmaI</i> |
| <i>PPDS-PTS1</i>                               | F: GCGGGATCCAAAATGGTGTATTCTCTCCC<br>R: CGCCCGGGGCTTACAACCTAGAGTTGTGAGGATGCAAAT      | <i>BamHI</i><br><i>SmaI</i> |
| <i>CPR</i>                                     | F: CGGCGGCCGCAAAATGGCTAAAGTGTCTCCCTTCGA<br>R: GCACTAGTTTACCATACATCACGCA             | <i>NotI</i><br><i>SpeI</i>  |
| <i>ADH2</i>                                    | F: CGGCGGCCGCAAAATGTCTATTCCAGAACTC<br>R: GCACTAGTTTATTAGAAAGTGCAACAA                | <i>NotI</i><br><i>SpeI</i>  |
| <i>P<sub>GPD</sub>-ERG9-T<sub>CYC1</sub></i>   | F: GCGCATGCAGTTTATCATTATCAATACTC<br>R: GCTCTAGAGCGGCCGCAAATTAAGC                    | <i>SphI</i><br><i>XbaI</i>  |
| <i>P<sub>PGK1</sub>-ERG1-T<sub>CYC1</sub></i>  | F: GCCTGCAGAGTTTATCATTATCAATACTC<br>R: CGCGTCGACGCGCCGCAAATTAAGC                    | <i>PstI</i><br><i>SalI</i>  |
| <i>P<sub>TEF1</sub>-tHMG1-T<sub>ADH1</sub></i> | F: CGCGGTACCCACACACCATAGCTTC<br>R: CGCGGTACCCACTAGGAGCGACC                          | <i>KpnI</i><br><i>KpnI</i>  |
| <i>P<sub>TEF1</sub>-DS-T<sub>ADH1</sub></i>    | F: GCGAATTCGAAGTACCTTCAAAGAAT<br>R: GCTCTAGACTTCGAGCGTCCCAA                         | <i>EcoRI</i><br><i>XbaI</i> |
| <i>P<sub>PGK1</sub>-PPDS-T<sub>CYC1</sub></i>  | F: TGTTTCGTACCACCAAGGAATTACTGGAGTTAGTTGAAGCATTAG<br>R: GTCCCAAGTTTATCATTATCAATACTC  |                             |
| <i>URA3</i>                                    | F: AGACCACATCATCCACGGTTCTATACTGTTGACCCAATGCGTCTC<br>R: CCTTGATTATCATGACATTAACCTAT   |                             |
|                                                | F: ACGTTGGTCAAGAAATCACAGCCGAAGCCATTAAGGTTCTTAA<br>R: AGCTATTAGTTTATCATTATCAATACTC   |                             |
| <i>LEU2</i>                                    | F: ATGGCCTTACCTTCTTCAGGCAAGTTCAATGACAATTTCAACATC<br>R: ATTGCATTATCATGACATTAACCTAT   |                             |
| <i>TRP1</i>                                    | F: ACCAAGAGTTCCTCGGTTTGCCAGTTATTAAGAAAGACTCGTATTT<br>R: CCAAAAAGTTTATCATTATCAATACTC |                             |

---

R:

*ΔATG36* AACACCAATAACGCCATTTAATCTAAGCGCATCACCAACATTTTC  
TGGCGATTATCATGACATTAACC TAT  
F: TGTATTCAGGGCTTAAAATACTAAAATTTGGTGGTCAGTACAGT  
TCATTAGACGTTGTAAAACGACGGCC  
R: CTCACATCATTGAATGACTTTAATCTATGGAAGTCTAGCTCAAAT  
TCCTCCACACAGGAAACAGCTATGACC  
F: GTATGTGTATCGGTACTGGTATGGGTGCCGCCGCCATCTTTATTA  
AAGAACGGATCCCCGGGTAAATTAA

*POT1-EGFP* R:  
ATATGAGCATAATAAAAAGGGAGAATATTA ACTATTATCAAGTAT  
TAAAAGAATTCGAGCTCGTTTAAAC

---
